# Supplementary material for: Gestational bisphenol A exposure impacts hepatic lipid metabolism in male offspring rats by regulating mTOR/CRTC2/SREBP1
Source: Research Square preprint supplement (doi:10.21203/rs.3.rs-1756683/v1), 2022-06-27
Supplement: Supplementary file 1 [file 201eebfc8294862727cc94c0.docx]

**Table 1.** Primer sequences.

| Gene | Primer sequence (5'-3') |
| --- | --- |
| mTOR | forward: CGGTCTGTGGGAAAGTCCTCATTG  reverse: CCCTGCTGTGTCTACAAGCTGAAG |
| CRTC2 | forward: CCCTACCTGACCTCACCAACCTAC  reverse: CAGACCTCCACTGATGCCCAAATG |
| SREBP-1  ACC1  FAS  SCD-1  PPARα  CPT1α  GAPDH | forward: CATCGACTACATCCGCTTCTTACAGTC  reverse: TTTCAGTGATTTGCTTTTGTGA  forward: AGGAAGATGGTGTCCGCTCTG  reverse: GGGGAGATGTGCTGGGTCAT  forward: CTCTGGAAGTGCATGCTGTAAGA  reverse: GGTAGATGTCATTTGCGAAAGGT  forward: CCTTAACCCTGAGATCCCGTAGA  reverse: AGCCCATAAAAGATTTCTGCAAA  forward: ACGATGCTGTCCTCCTTGATGAAC  reverse: ATGATGTCGCAGAATGGCTTCCTC  forward: GCCCATGTTGTACAGCTTCCA  reverse: AGTCTTCTTCCTTCATCAGTGGC  forward: GCAAGAGAGAGGCCCTCAG  reverse: TGTGAGGGAGATGCTCACTG |
